# Supplementary material
Source: PubMed Central journal article supplement (PMC4964792)
Supplement: NIHMS792056-supplement-supplement_1.pdf [file NIHMS792056-supplement-supplement_1.pdf]

**Supplementary Table 1.** Usual cycle length and fecundability, stratified by selected factors, PRESTO, 2013-15.

| Characteristic                     | Cycle length, days |           |                  |
|------------------------------------|--------------------|-----------|------------------|
|                                    | <27                | 27-29     | ≥30              |
| <b>Overall</b>                     |                    |           |                  |
| No. of pregnancies                 | 108                | 415       | 254              |
| No. of cycles                      | 869                | 3040      | 1810             |
| FR (95% CI)*                       | 0.89 (0.73-1.08)   | Reference | 1.01 (0.87-1.16) |
| <b>Age at baseline</b>             |                    |           |                  |
| <b>&lt;30 years</b>                |                    |           |                  |
| No. of pregnancies                 | 47                 | 196       | 117              |
| No. of cycles                      | 374                | 1266      | 766              |
| FR (95% CI)*                       | 0.78 (0.58-1.05)   | Reference | 0.96 (0.78-1.19) |
| <b>≥30 years</b>                   |                    |           |                  |
| No. of pregnancies                 | 61                 | 219       | 137              |
| No. of cycles                      | 495                | 1774      | 1044             |
| FR (95% CI)*                       | 1.00 (0.77-1.30)   | Reference | 1.07 (0.87-1.30) |
| <b>Body mass index</b>             |                    |           |                  |
| <b>&lt;25 kg/m<sup>2</sup></b>     |                    |           |                  |
| No. of pregnancies                 | 53                 | 224       | 146              |
| No. of cycles                      | 414                | 1619      | 909              |
| FR (95% CI)*                       | 0.92 (0.70-1.21)   | Reference | 1.10 (0.91-1.33) |
| <b>≥25 kg/m<sup>2</sup></b>        |                    |           |                  |
| No. of pregnancies                 | 55                 | 191       | 108              |
| No. of cycles                      | 455                | 1421      | 901              |
| FR (95% CI)*                       | 0.88 (0.66-1.16)   | Reference | 0.89 (0.71-1.11) |
| <b>Parity</b>                      |                    |           |                  |
| <b>Nulliparous</b>                 |                    |           |                  |
| No. of pregnancies                 | 69                 | 265       | 155              |
| No. of cycles                      | 544                | 1992      | 1226             |
| FR (95% CI)*                       | 0.98 (0.77-1.25)   | Reference | 0.97 (0.81-1.17) |
| <b>Parous</b>                      |                    |           |                  |
| No. of pregnancies                 | 39                 | 150       | 99               |
| No. of cycles                      | 325                | 1048      | 584              |
| FR (95% CI)*                       | 0.71 (0.51-1.00)   | Reference | 1.03 (0.82-1.31) |
| <b>Attempt time at study entry</b> |                    |           |                  |
| <b>0-2 cycles</b>                  |                    |           |                  |
| No. of pregnancies                 | 80                 | 293       | 187              |
| No. of cycles                      | 526                | 2044      | 1190             |
| FR (95% CI)*                       | 0.98 (0.78-1.23)   | Reference | 1.04 (0.88-1.23) |
| <b>3-6 cycles</b>                  |                    |           |                  |
| No. of pregnancies                 | 28                 | 122       | 67               |
| No. of cycles                      | 343                | 996       | 620              |
| FR (95% CI)*                       | 0.68 (0.46-1.01)   | Reference | 0.90 (0.67-1.19) |

412 \* Adjusted for age (<25, 25-29, 30-34, ≥35 years), race (white, non-white), education (<college  
413 degree, college degree, graduate school), BMI (<25, 25-29, 30-34, ≥35 kg/m<sup>2</sup>), smoking (never,

414 <5 , ≥5 pack-years), intercourse frequency (<1, 1, 2-3, ≥4 times/week), last method of  
415 contraception (hormonal, barrier, other methods) and history of gynecologic disease.  
416
